# Supplementary material for: Isolation and Characterization of n-3 Polyunsaturated Fatty Acids in Enteromorpha prolifera Lipids and Their Preventive Effects on Ulcerative Colitis in C57BL/6J Mice
Source: MDPI journal article supplement (doi:10.3390/foods13010046), 2023-12-21

## Supplementary data

The following are the Supplementary data to this article:

**Figure S1** PLS-DA scores plot of (A) control and DSS groups and (B) EP oil and DSS group.

(C) VIP of PLS-DA between control and DSS groups.

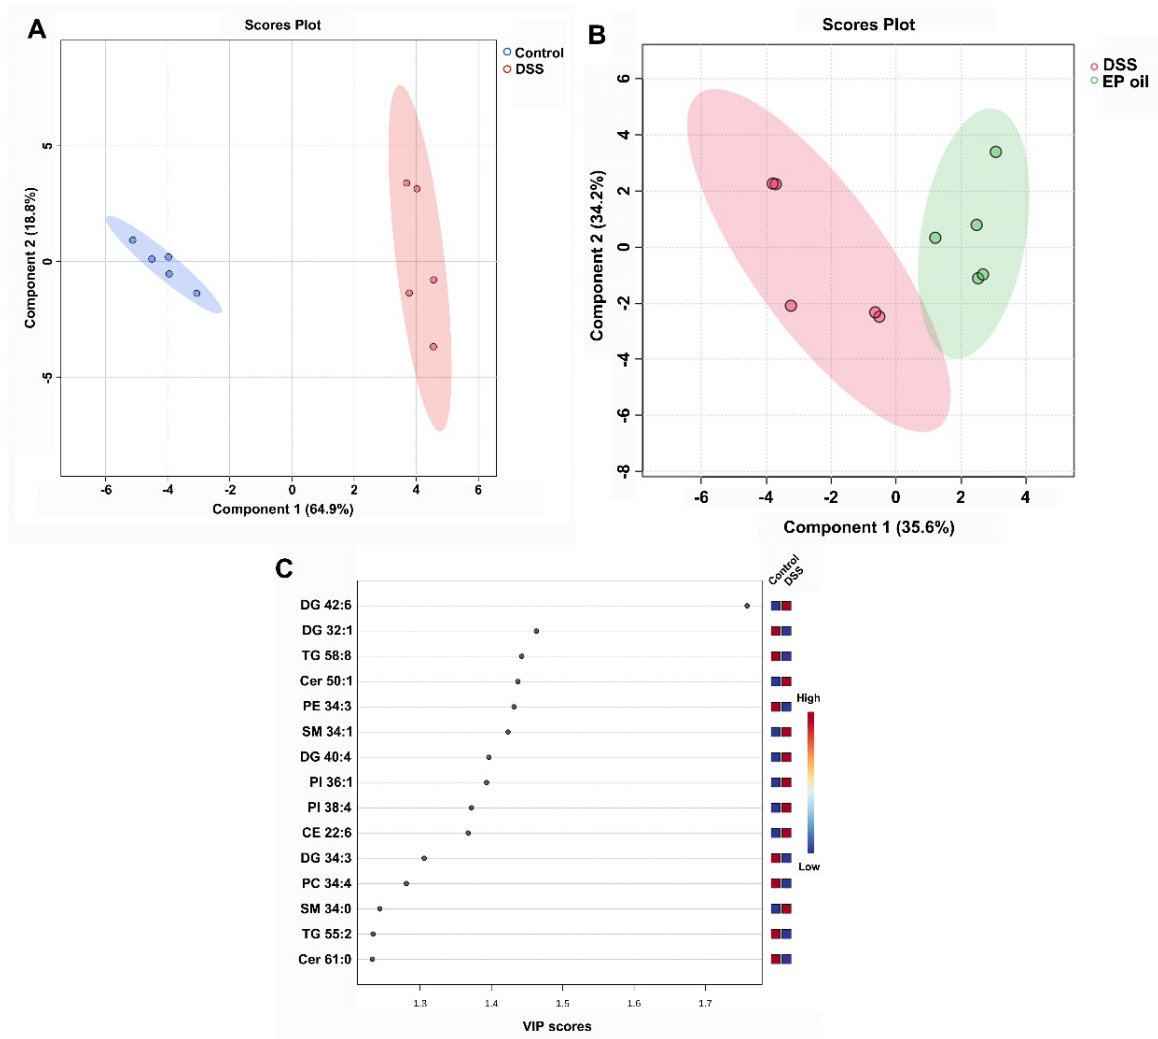

**Figure S2** Heat map of (A) control and DSS groups and (B) EP oil and DSS group.

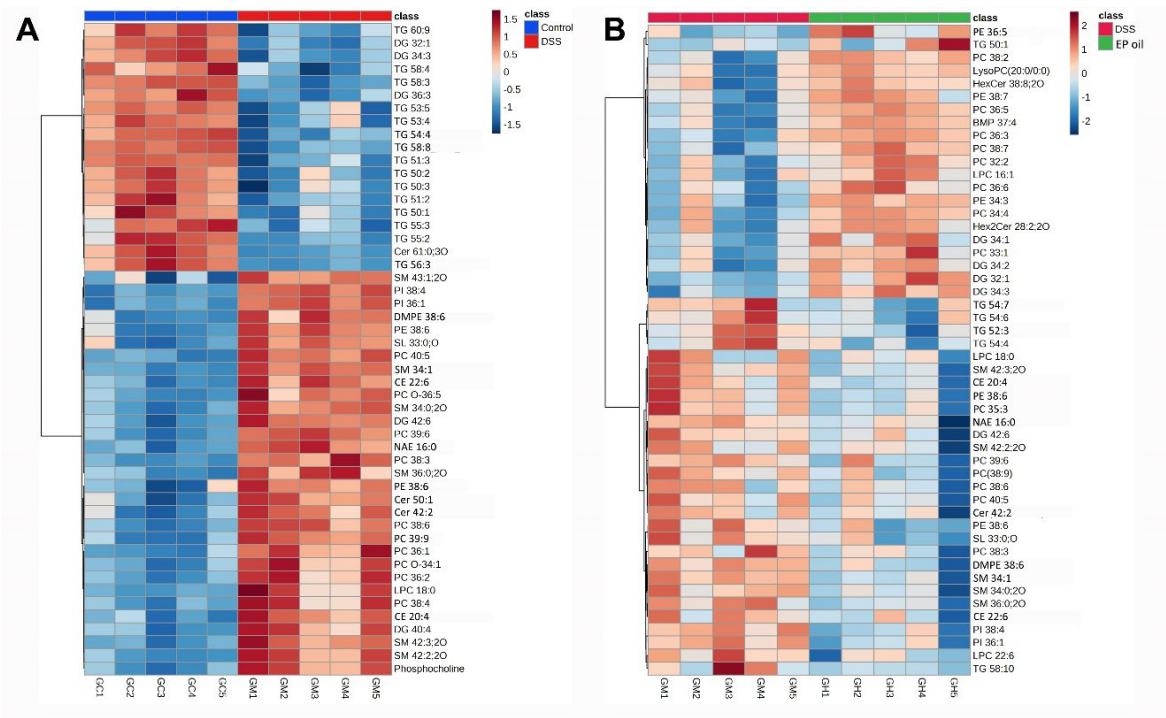

**Figure S3** Volcano plot of (A) control and DSS groups and (B) EP oil and DSS group.

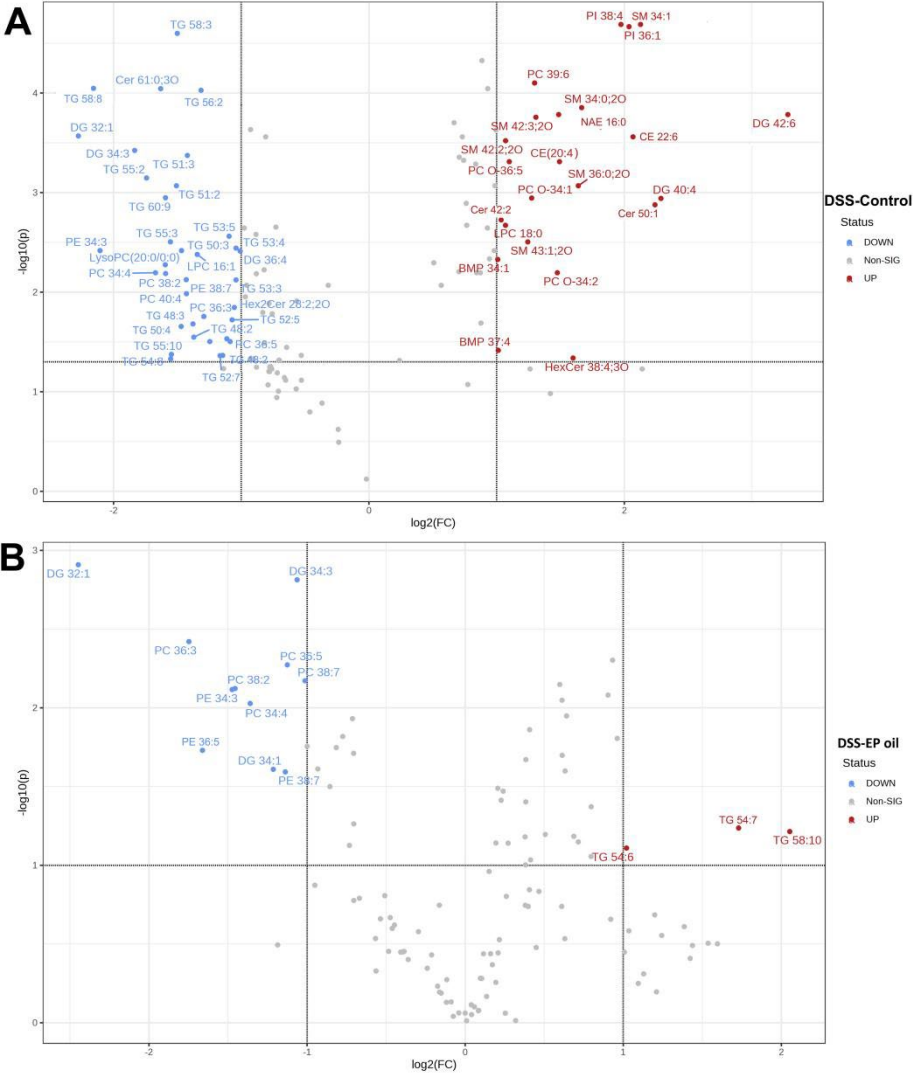

**Figure S4** Lipid metabolite enrichment analysis between control and DSS groups.

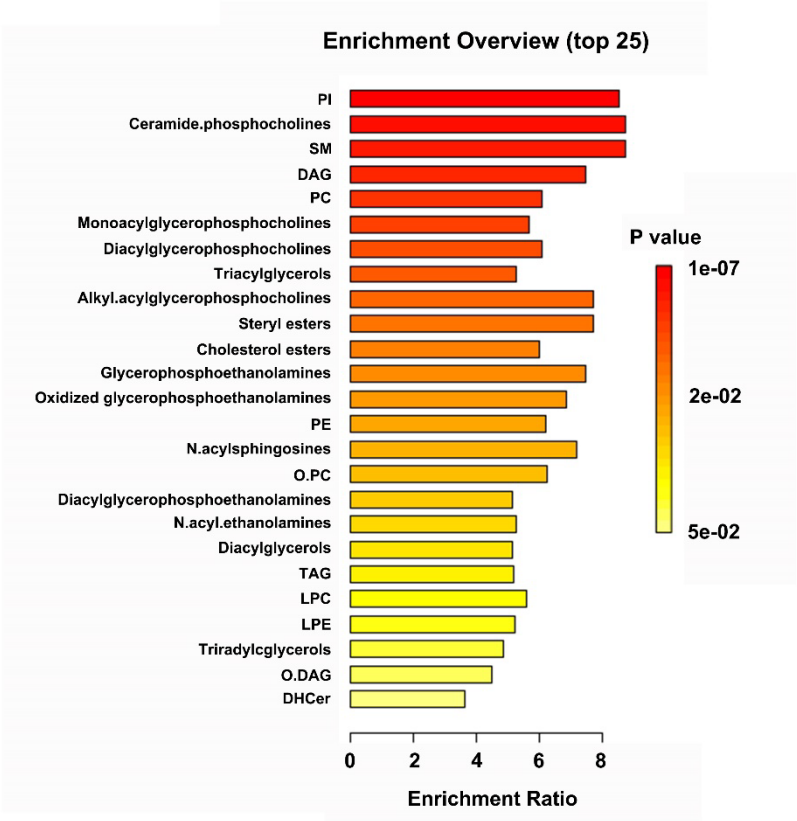

**Figure S5** Metabolism pathway analysis of lipid metabolites between control and DSS groups.

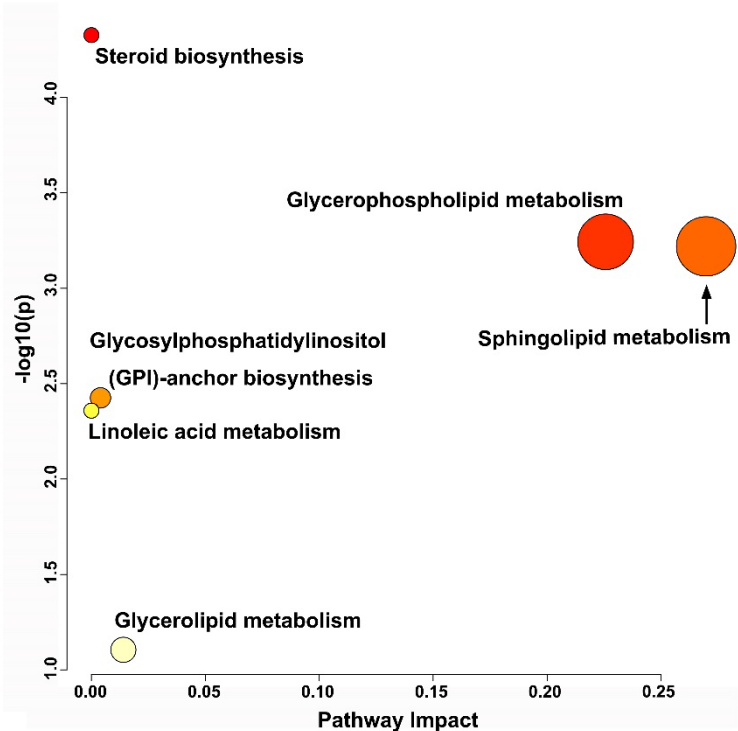

Supplement: s1 [file s1]
